# Supplementary material
Source: PubMed Central journal article supplement (PMC3697642)
Supplement: JB.00292-13_zjb999092691so1.pdf [file JB.00292-13_zjb999092691so1.pdf]

Supplemental Table 1 Oligo Primers

| Primer   | Sequence 5' to 3'                                                              | Description of use                            |
|----------|--------------------------------------------------------------------------------|-----------------------------------------------|
| CDEP1430 | cacctaaggaggctttcttaatggataagagattacagc                                        | Clone IPTG-inducible <i>rsiV</i> <sup>+</sup> |
| CDEP952  | ccataatcttagatggatg                                                            | Clone IPTG-inducible <i>rsiV</i> <sup>+</sup> |
| CDEP1460 | caccatggataagagattacagcaattaagag                                               | Clone <i>gfp-rsiV</i> <sup>+</sup>            |
| CDEP978  | tcagttgatattaacaagcgag                                                         | Clone <i>rsiV</i> <sup>1-60</sup>             |
| CDEP568  | aagtcgactaaggagggtgaatttatgactataatagccgc                                      | Clone IPTG-inducible <i>rasP</i>              |
| CDEP569  | aagcatgccttatttaaaactacatagcc                                                  | Clone IPTG-inducible <i>rasP</i>              |
| CDEP1245 | caccaagcttaaggaggatttatagatgttgccaaaaagaatcaaa<br>tgg                          | Clone IPTG-inducible <i>pdaC</i>              |
| CDEP1246 | aacgtacgcttaaagtgttggccacc                                                     | Clone IPTG-inducible <i>pdaC</i>              |
| CDEP1007 | caccaacccggacgccgctcaggc                                                       | Clone <i>6xhis-rsiV</i> <sup>69-285</sup>     |
| CDEP209  | tgtctctgctggtgatctgg                                                           | LFH-KO <i>rasP::tet</i>                       |
| CDEP1575 | caattgccctatagtgagtcgctccgaaaataatgataaacgc                                    | LFH-KO <i>rasP::tet</i>                       |
| CDEP1576 | ccagctttgtcccttagtgagttgcatggaacgat                                            | LFH-KO <i>rasP::tet</i>                       |
| CDEP212  | gcaagctctacaacttctgc                                                           | LFH-KO <i>rasP::tet</i>                       |
| CDEP615  | aaaagcttaaggaggaaggatccatgggtccgctggctccgctgct<br>ggttctggcatgagcaaaggagaagaac | Clone superfold GFP                           |
| CDEP618  | aaagatctgctagcttagaattcgccagaaccagcagcggagcca<br>gcggaaccctttagagctcatccatgc   | Clone superfold GFP                           |

**Figure S1: Examples of ECF factor activation and a model for  $\nu$  activation.**

Shown in green are proteases for Site-1 cleavage, in light blue the substrates, in dark blue the proteases for Site-2 cleavage, and in yellow transcription factors activated or released as a consequence of Site-2 cleavage. Red arrows point to the sites of cleavage on the substrates.

**Figure S2. GFP-RsiV localizes to the membrane.**

*B. subtilis* strains *P<sub>hs</sub>-gfp* (JLH370) and *P<sub>hs</sub>-gfp-rsiV* (JLH453) were grown to an OD of 0.6 before 1mM of IPTG was added. Cells were incubated for an additional 1 hour at 37°C. 5  $\mu$ l of culture were spotted on a 2% agarose pad and viewed using a fluorescent microscopy as previously described (1). Exposure time for images was 3 seconds. Images were taken at 12-bit, converted to JPEG and transferred to GIMP (GNU Image Manipulation Program) for crop and small contrast corrections.

1. **Tarry M, Arends SJR, Roversi P, Piette E, Sargent F, Berks BC, Weiss DS, Lea SM.** 2009. The *Escherichia coli* Cell Division Protein and Model Tat Substrate SufI (FtsP) Localizes to the Septal Ring and Has a Multicopper Oxidase-Like Structure. *Journal of Molecular Biology* **386**:504-519.
