# Supplementary material
Source: PubMed Central journal article supplement (PMC3697642)
Supplement: JB.00292-13_zjb999092691so2.pdf [file JB.00292-13_zjb999092691so2.pdf]

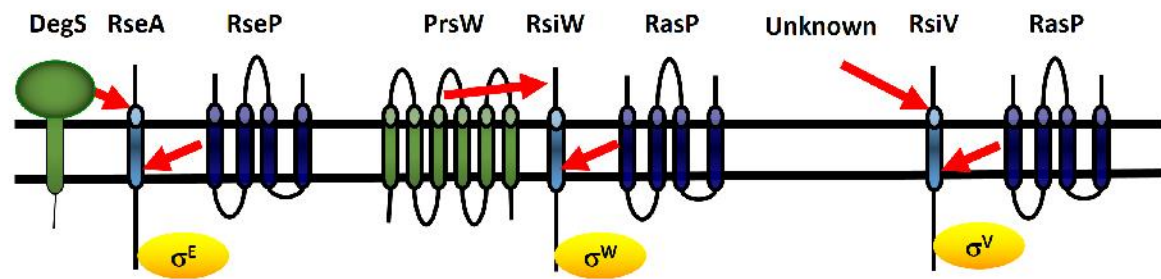

Hastie and Ellermeier Figure S1
