# Supplementary material
Source: PubMed Central journal article supplement (PMC3697642)

$P_{hs-gfp}$

$P_{hs-gfp-rsiV}$

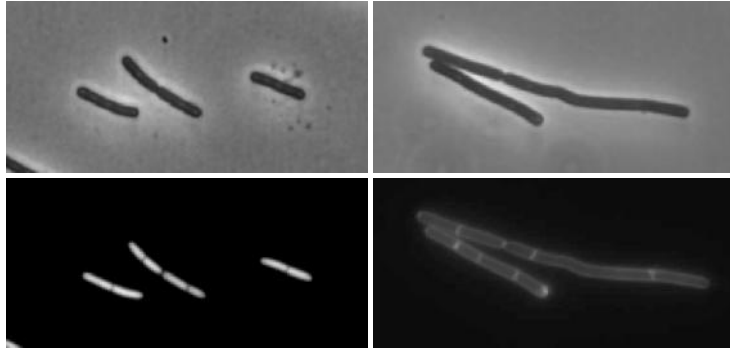

Supplement: JB.00292-13_zjb999092691so3.pdf [file JB.00292-13_zjb999092691so3.pdf]
